# Supplementary material for: Efficient cascade reactions for luminescent pyrylium biolabels catalysed by light rare-earth elements
Source: Royal Society of Chemistry journal article supplement (doi:10.1039/d1nj01793d), 2021-01-01
Supplement: d1nj01793d1.pdf [file d1nj01793d1.pdf]

## Electronic Supplementary Information

### **Efficient Cascade Reactions for Luminescent Pirylium Biolabels Catalysed by Light Rare-Earth Elements**

Guangming Wang<sup>a</sup>, Xun Li<sup>a</sup>, Xuepu Wang<sup>a</sup>, and Kaka Zhang<sup>\*a</sup>

---

<sup>a</sup> G. Wang, X. Li, Dr. X. Wang, Prof. Dr. K. Zhang  
Key Laboratory of Synthetic and Self-Assembly Chemistry for Organic Functional Molecules, Shanghai Institute of Organic Chemistry,  
University of Chinese Academy of Sciences, Chinese Academy of Sciences  
345 Lingling Road, Shanghai 200032, People's Republic of China  
Email: zhangkaka@sioc.ac.cn

## Table of Contents

- Fig. S1** Color change of the reaction mixture of anisole, acetic anhydride and europium(III) triflate.
- Fig. S2** Thin-layer chromatography of the reaction mixture of anisole, acetic anhydride and europium(III) triflate under day light, 254 nm UV lamp and 365 nm UV lamp.
- Fig. S3**  $^1\text{H}$  NMR spectrum of 730 (400 MHz,  $\text{DMSO-}d_6$ , 298 K).
- Fig. S4**  $^{13}\text{C}\{^1\text{H}\}$  NMR spectrum of 730 (100 MHz,  $\text{DMSO-}d_6$ , 298 K).
- Fig. S5**  $^{19}\text{F}$  NMR spectrum of 730 (376 MHz,  $\text{DMSO-}d_6$ , 298 K).
- Fig. S6** HRMS-ESI report of 730.
- Fig. S7** HRMS-ESI report of 345-730.
- Fig. S8** FT-IR spectrum of 730.
- Fig. S9** Photographs of the reaction mixture in control experiments: (left) the reaction mixture of anisole and acetic anhydride; (right) the reaction mixture of anisole and europium(III) triflate.
- Fig. S10** Photographs of thin-layer chromatography of the reaction mixture of anisole, acetic anhydride and europium(III) triflate under 254 nm UV lamp.
- Fig. S11** Photographs of 730 purified by recrystallization in deionized water.
- Fig. S12** TEM images of 730NPs.
- Fig. S13** Zeta-potential distribution of 730 nanoparticles in aqueous medium.
- Fig. S14** UV-Vis spectra of fresh-prepared 730NPs and 730NPs after 7-day storage.
- Fig. S15** UV-Vis spectra of fresh-prepared BSA-730 and BSA-730 after 7-day storage.
- Table S1.** Crystal data and structure refinement for mo\_d8v20371\_0m.
- Table S2.** Fractional Atomic coordinates ( $\times 10^4$ ) and equivalent isotropic displacement parameters ( $\text{\AA}^2 \times 10^3$ ) for mo\_d8v20371\_0m.  $U(\text{eq})$  is defined as one third of the trace of the orthogonalized  $U^{ij}$  tensor.
- Table S3.** Bond lengths [ $\text{\AA}$ ] and angles [ $^\circ$ ] for mo\_d8v20371\_0m.

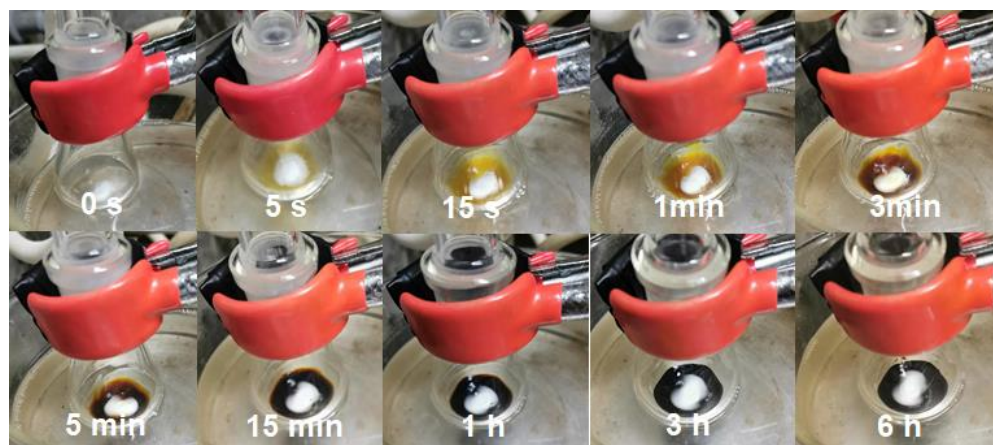

**Fig. S1** Color change of the reaction mixture of anisole, acetic anhydride and europium(III) triflate.

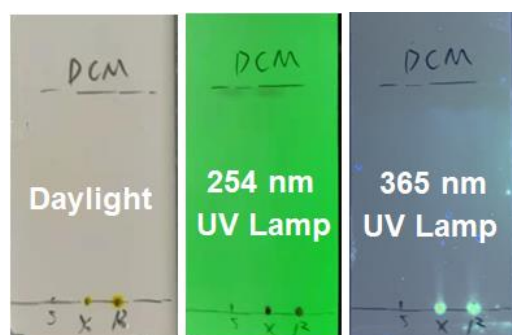

**Fig. S2** Thin-layer chromatography of the reaction mixture of anisole, acetic anhydride and europium(III) triflate under day light, 254 nm UV lamp and 365 nm UV lamp. In the TLC plate, S, X, and R represent anisole, anisole and reaction mixture, and reaction mixture, respectively.

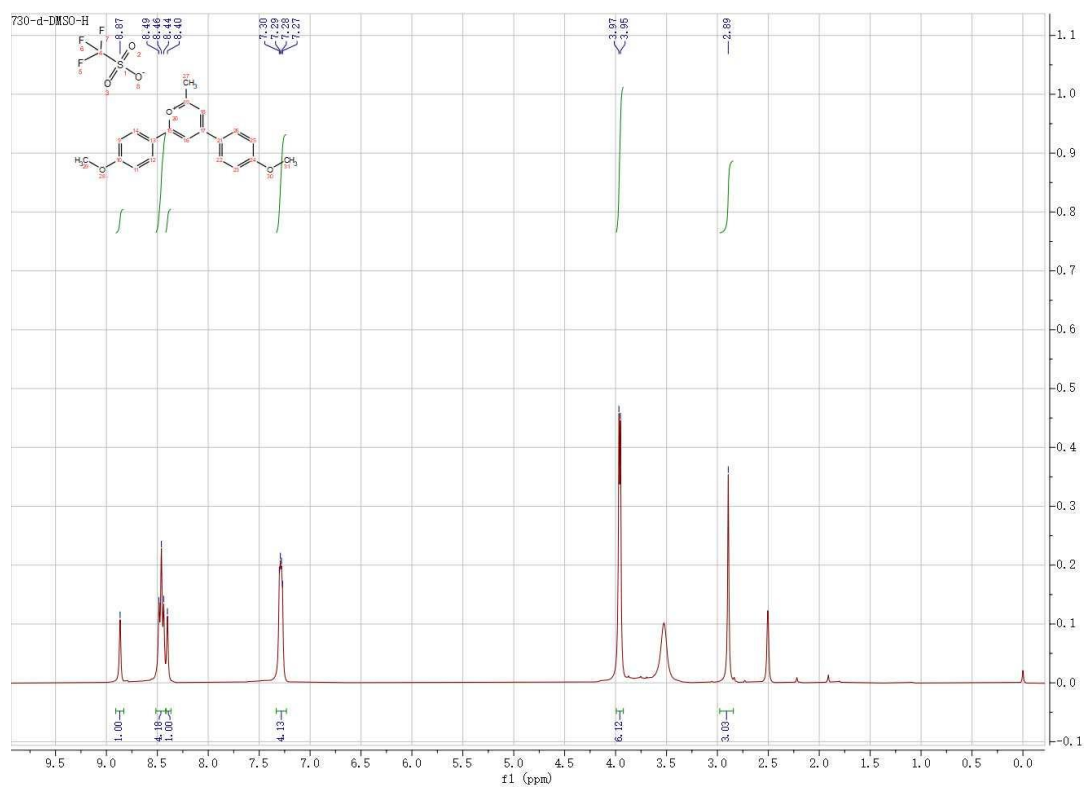

**Fig. S3**  $^1\text{H}$  NMR spectrum of 730 (400 MHz, DMSO- $d_6$ , 298 K).

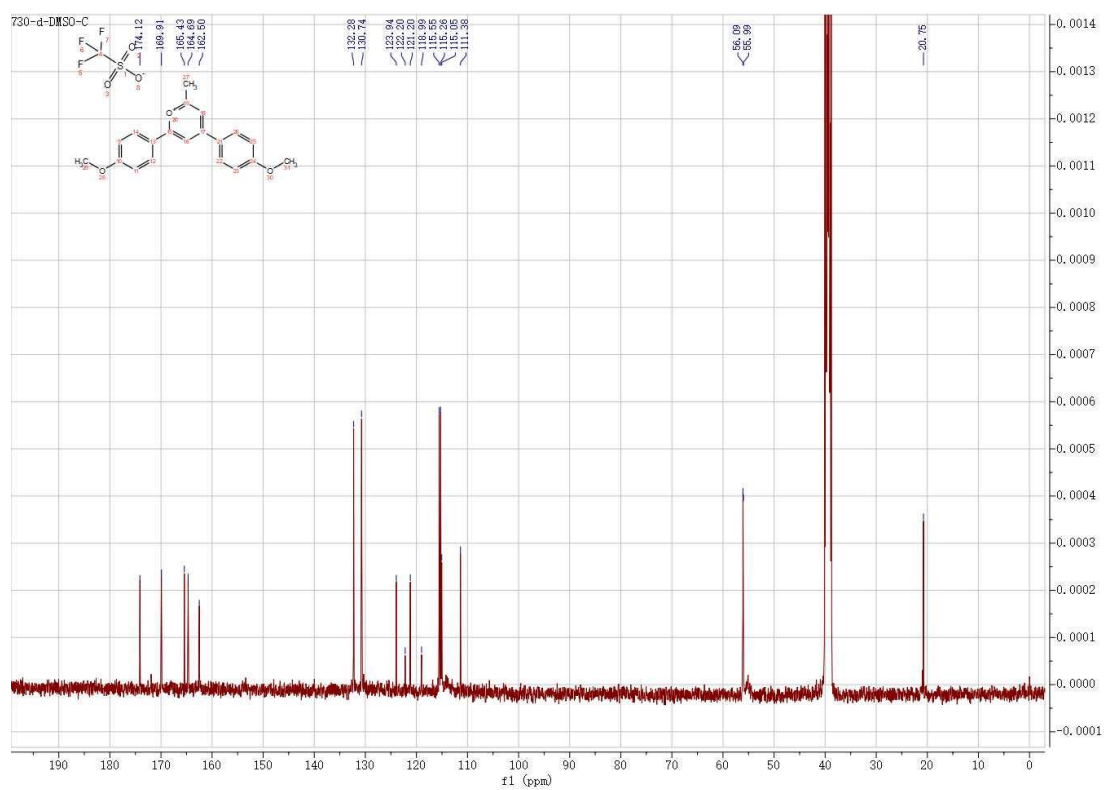

**Fig. S4**  $^{13}\text{C}\{^1\text{H}\}$  NMR spectrum of 730 (100 MHz, DMSO- $d_6$ , 298 K).

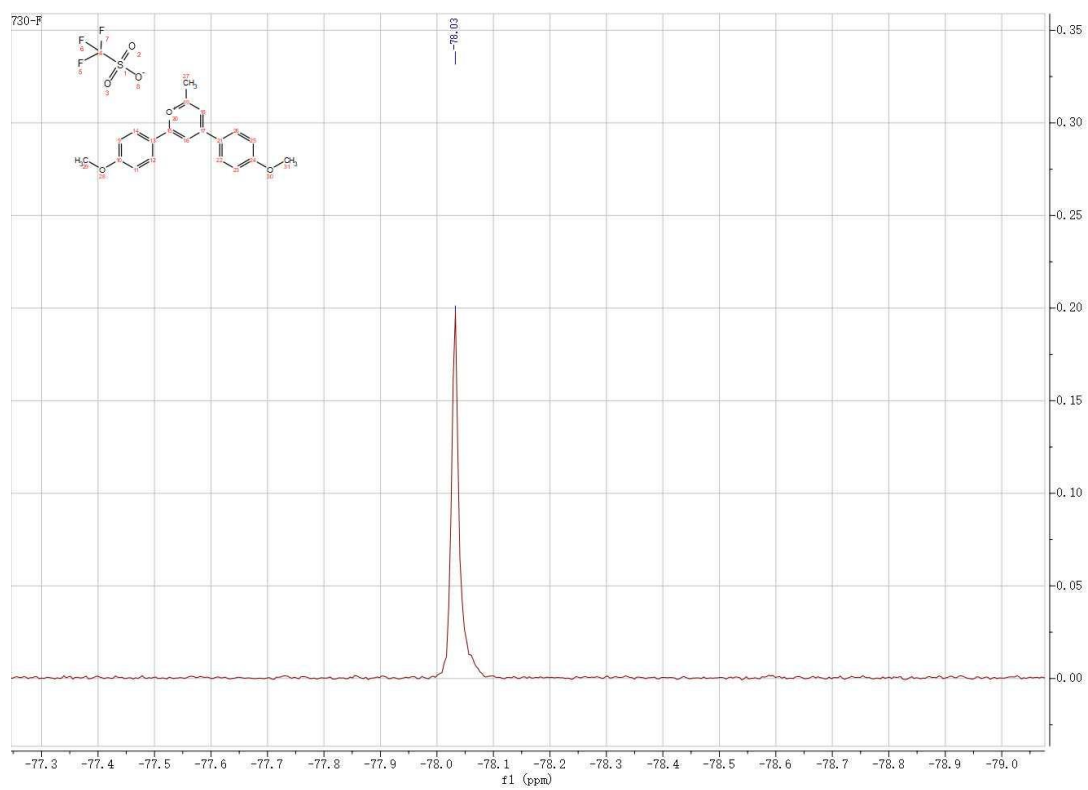

**Fig. S5**  $^{19}\text{F}$  NMR spectrum of 730 (376 MHz,  $\text{DMSO-}d_6$ , 298 K).

National Center for Organic Mass Spectrometry in Shanghai  
Shanghai Institute of Organic Chemistry  
Chinese Academic of Sciences  
High Resolution ESI-MS REPORT

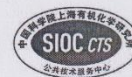

Instrument: Thermo Scientific Q Exactive HF Orbitrap-FTMS

Card Serial Number: E202070

Sample Serial Number: Wgm-730

Operator: Songw      Date: 2020/10/26

Operation Mode: ESI Positive Ion Mode

Elemental composition search on mass 307.13

m/z= 302.13-312.13

| m/z      | Theo.<br>Mass | Delta<br>(ppm) | RDB<br>equiv. | Composition                                                   |
|----------|---------------|----------------|---------------|---------------------------------------------------------------|
| 307.1328 | 307.1329      | -0.10          | 11.5          | C <sub>20</sub> H <sub>19</sub> O <sub>3</sub>                |
|          | 307.1315      | 4.27           | 12.0          | C <sub>18</sub> H <sub>17</sub> O <sub>2</sub> N <sub>3</sub> |

**Fig. S6** HRMS-ESI report of 730.

National Center for Organic Mass Spectrometry in Shanghai  
Shanghai Institute of Organic Chemistry  
Chinese Academic of Sciences  
High Resolution ESI-MS REPORT

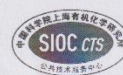

Instrument: Thermo Scientific Q Exactive HF Orbitrap-FTMS

Card Serial Number: E211048

Sample Serial Number: 345730

Operator: Songw Date: 2021/04/02

Operation Mode: ESI Positive Ion Mode

Elemental composition search on mass 427.1749

m/z= 422.1749-432.1749

| m/z      | Theo.<br>Mass | Delta<br>(ppm) | RDB<br>equiv. | Composition                                    |
|----------|---------------|----------------|---------------|------------------------------------------------|
| 427.1749 | 427.1751      | -0.61          | 11.5          | C <sub>24</sub> H <sub>27</sub> O <sub>7</sub> |

**Fig. S7** HRMS-ESI report of 345.



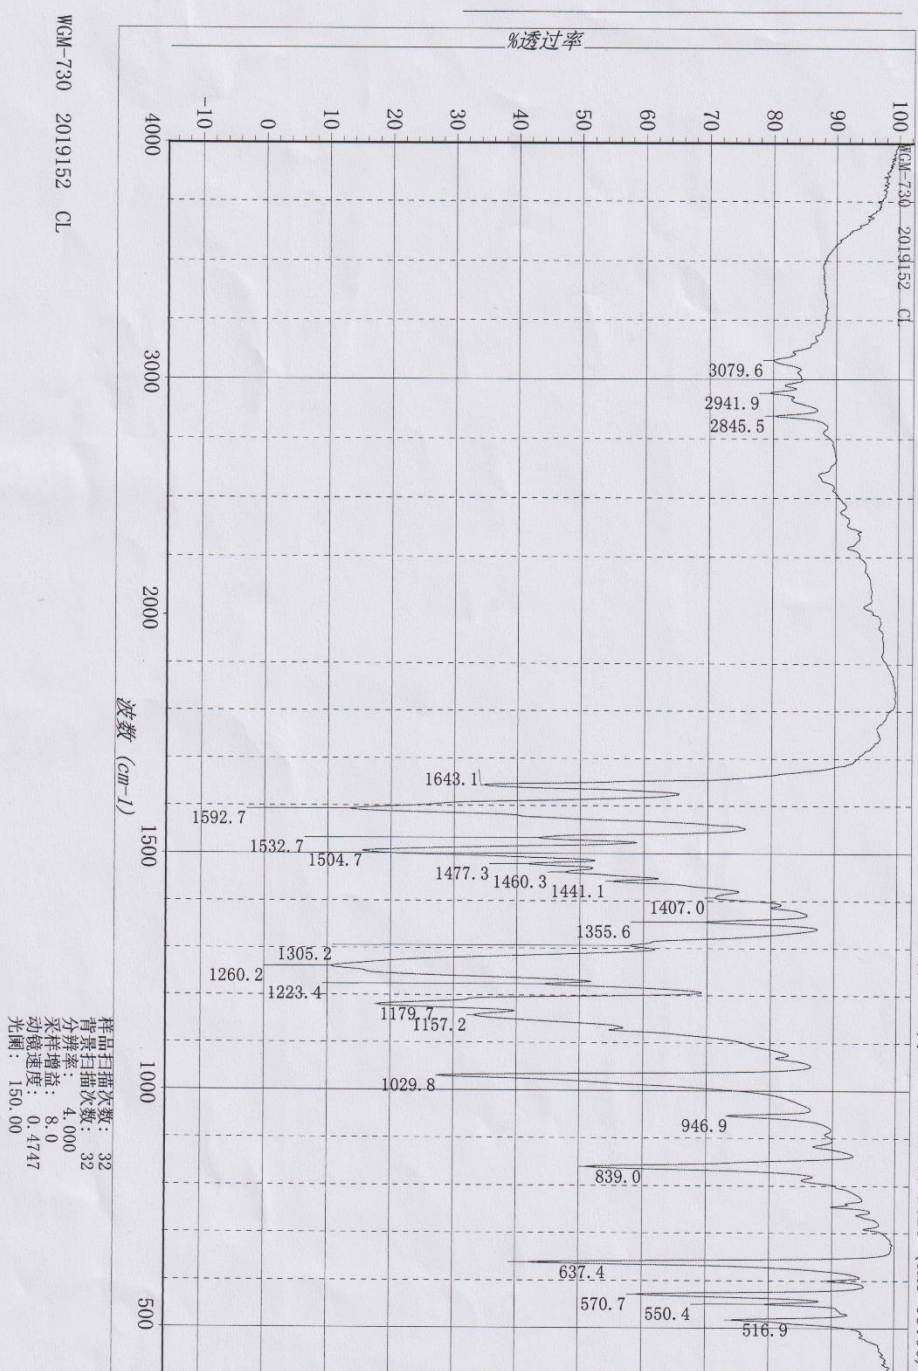

Fig. S8 FT-IR spectrum of 730.



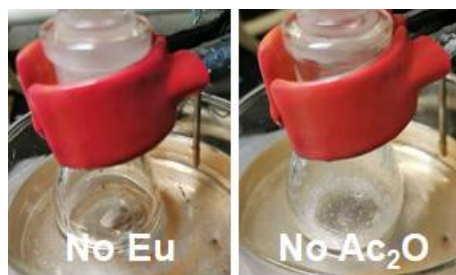

**Fig. S9** Photographs of the reaction mixture in control experiments: (left) the reaction mixture of anisole and acetic anhydride; (right) the reaction mixture of anisole and europium(III) triflate.

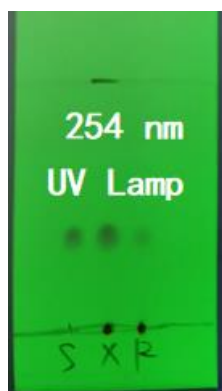

**Fig. S10** Photographs of thin-layer chromatography of the reaction mixture of anisole, acetic anhydride and europium(III) triflate under 254 nm UV lamp. In the TLC plate, S, X, and R represent 4-methoxyacetophenone, 4-methoxyacetophenone and reaction mixture, and reaction mixture, respectively.

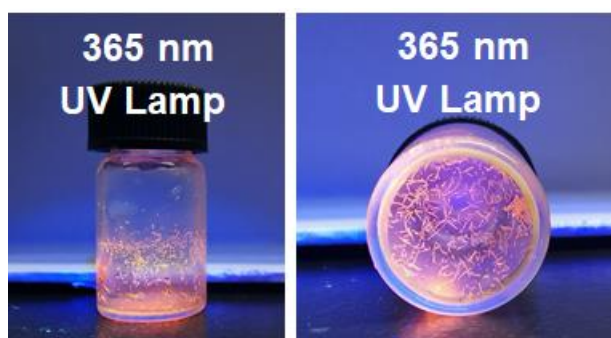

**Fig. S11** Photographs of 730 purified by recrystallization in acetonitrile/deionized water.

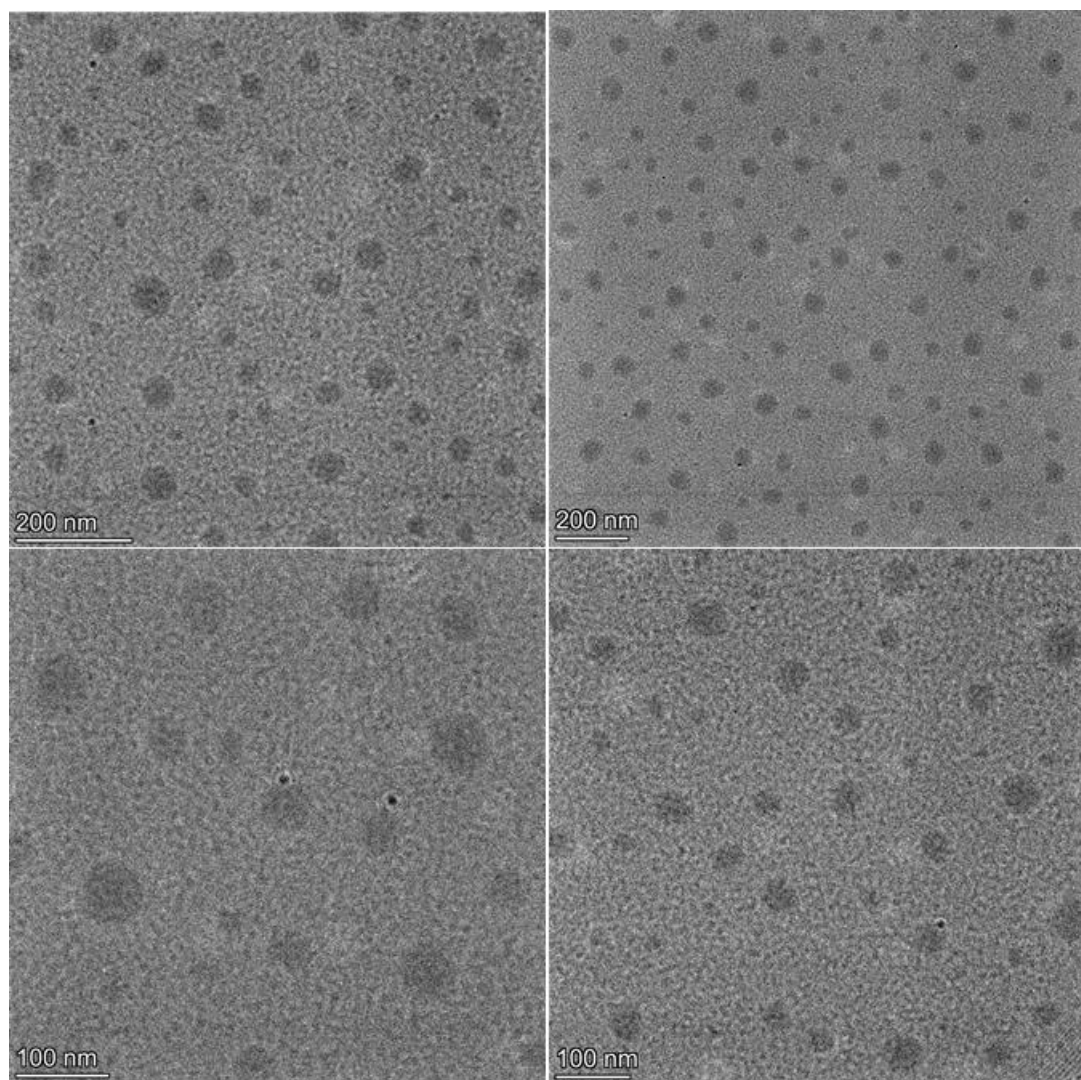

**Fig. S12** TEM images of 730NPs. The black dots in the TEM images have smaller sizes (approximately 10 nm) than 730NPs but show a higher electron contrast than 730NPs, which can rule out the possibility that the black dots are formed by 730 molecules. The distribution of hydrodynamic diameters of 730NPs in aqueous suspension (Fig. 2b) shows the absence of signals around 10 nm. Therefore, the black dots in Fig. S12 are tentatively assigned to a small quantity of defect or impurity on carbon-coated copper grids, which is commonly observed during TEM studies.

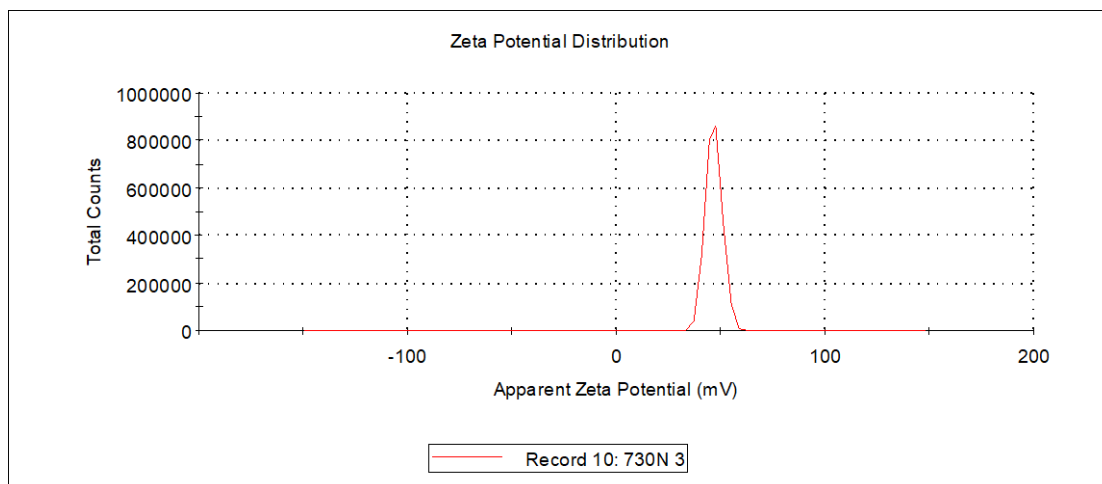

**Fig. S13** Zeta-potential distribution of 730 nanoparticles in aqueous medium. The average zeta-potential of 730NPs was measured to be +46.9 mV.

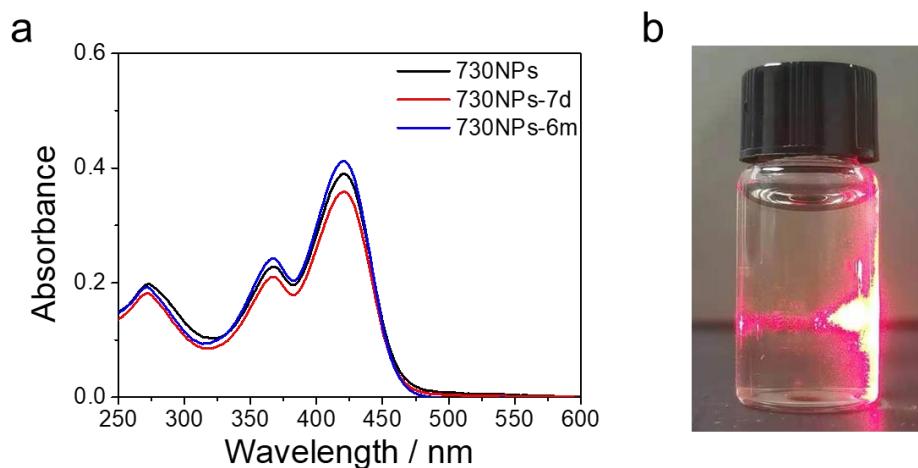

**Fig. S14** (a) UV-Vis spectra of fresh-prepared 730NPs and 730NPs after 7-day or 6-month storage. The 730NPs prepared six months ago is still stable as evidenced from their UV-vis spectra and Tyndall effect of the aqueous suspension (b).

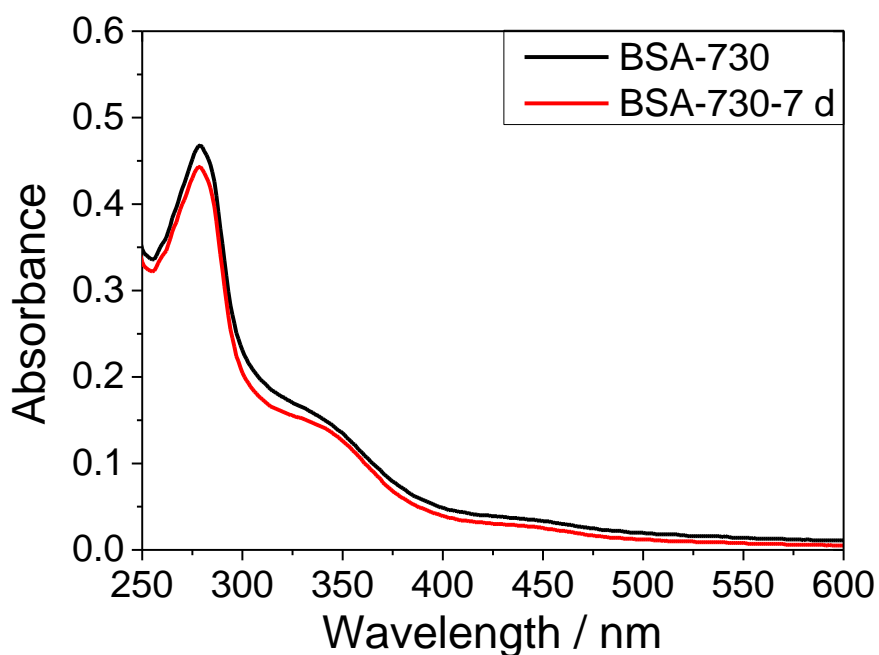

**Fig. S15** UV-Vis spectra of fresh-prepared BSA-730 and BSA-730 after 7-day storage.

**Table S1.** Crystal data and structure refinement for mo\_d8v20371\_0m.

|                                 |                                                                 |                                |
|---------------------------------|-----------------------------------------------------------------|--------------------------------|
| Identification code             | mo_d8v20371_0m                                                  |                                |
| Empirical formula               | C <sub>21</sub> H <sub>19</sub> F <sub>3</sub> O <sub>6</sub> S |                                |
| Formula weight                  | 456.42                                                          |                                |
| Temperature                     | 193(2) K                                                        |                                |
| Wavelength                      | 0.71073 Å                                                       |                                |
| Crystal system                  | Triclinic                                                       |                                |
| Space group                     | P -1                                                            |                                |
| Unit cell dimensions            | a = 8.291(3) Å                                                  | $\alpha = 100.873(14)^\circ$ . |
|                                 | b = 10.898(5) Å                                                 | $\beta = 105.640(13)^\circ$ .  |
|                                 | c = 11.966(5) Å                                                 | $\gamma = 95.465(14)^\circ$ .  |
| Volume                          | 1010.2(8) Å <sup>3</sup>                                        |                                |
| Z                               | 2                                                               |                                |
| Density (calculated)            | 1.500 Mg/m <sup>3</sup>                                         |                                |
| Absorption coefficient          | 0.225 mm <sup>-1</sup>                                          |                                |
| F(000)                          | 472.6                                                           |                                |
| Crystal size                    | 0.150 x 0.120 x 0.070 mm <sup>3</sup>                           |                                |
| Theta range for data collection | 2.332 to 25.000°.                                               |                                |
| Index ranges                    | -10 ≤ h ≤ 7, -13 ≤ k ≤ 14, -14 ≤ l ≤ 15                         |                                |

|                                   |                                             |
|-----------------------------------|---------------------------------------------|
| Reflections collected             | 8367                                        |
| Independent reflections           | 3432 [Rint = 0.1021, Rsigma = 0.1739]       |
| Completeness to theta = 25.242°   | 93.8 %                                      |
| Absorption correction             | Semi-empirical from equivalents             |
| Max. and min. transmission        | 0.7456 and 0.5661                           |
| Refinement method                 | Full-matrix least-squares on F <sup>2</sup> |
| Data / restraints / parameters    | 3432 / 65 / 328                             |
| Goodness-of-fit on F <sup>2</sup> | 1.119                                       |
| Final R indices [I>2sigma(I)]     | R1 = 0.0905, wR2 = 0.2011                   |
| R indices (all data)              | R1 = 0.1823, wR2 = 0.2641                   |
| Extinction coefficient            | n/a                                         |
| Largest diff. peak and hole       | 0.63/-0.69 e.Å <sup>-3</sup>                |

**Table S2.** Fractional Atomic coordinates ( $\times 10^4$ ) and equivalent isotropic displacement parameters ( $\text{\AA}^2 \times 10^3$ ) for mo\_d8v20371\_0m.  $U(\text{eq})$  is defined as one third of the trace of the orthogonalized  $U^{ij}$  tensor.

|        | x         | y        | z         | U(eq)    |
|--------|-----------|----------|-----------|----------|
| S(1)   | 748(3)    | 7540(2)  | 8046(3)   | 45.9(7)  |
| F(1)   | -1296(7)  | 6209(5)  | 6045(5)   | 98(2)    |
| F(2)   | 1236(8)   | 5848(7)  | 6371(7)   | 111(3)   |
| F(3)   | 544(11)   | 7516(7)  | 5829(6)   | 128(3)   |
| O(4)   | -316(7)   | 8484(5)  | 8003(6)   | 66.2(18) |
| O(5)   | 2546(7)   | 7993(6)  | 8377(7)   | 99(2)    |
| O(6)   | 344(9)    | 6535(4)  | 8580(5)   | 71(2)    |
| C(21)  | 311(11)   | 6757(8)  | 6485(8)   | 61(2)    |
| S(1A)  | 250(30)   | 7320(20) | 7980(20)  | 80       |
| F(1A)  | 610(50)   | 5960(30) | 6090(40)  | 80       |
| F(2A)  | 2150(30)  | 7760(20) | 6640(30)  | 80       |
| F(3A)  | -420(40)  | 7620(30) | 5870(30)  | 80       |
| O(4A)  | -1330(30) | 6670(30) | 7690(30)  | 80       |
| O(5A)  | 540(50)   | 8680(30) | 8420(40)  | 80       |
| O(6A)  | 1580(40)  | 6740(30) | 8570(30)  | 80       |
| C(21A) | 690(50)   | 7180(40) | 6550(30)  | 80       |
| O(1)   | -4633(6)  | 1804(4)  | 4819(4)   | 67.0(13) |
| O(2)   | 3585(5)   | 2965(4)  | 10909(4)  | 44.4(12) |
| O(3)   | 7322(13)  | 8457(8)  | 13347(9)  | 60(3)    |
| O(3A)  | 6990(50)  | 8730(30) | 13070(30) | 78(11)   |
| O(7)   | 1421(6)   | 1676(5)  | 9377(5)   | 45.4(15) |
| C(1)   | 2741(7)   | 1795(5)  | 10339(6)  | 42.6(15) |
| C(1A)  | 3585(5)   | 2965(4)  | 10909(4)  | 44.4(12) |
| C(2)   | 3372(8)   | 761(6)   | 10846(6)  | 59.6(19) |
| C(3)   | 3138(7)   | 4021(5)  | 10525(5)  | 40.0(14) |
| C(4)   | 1768(7)   | 3889(5)  | 9548(6)   | 43.3(15) |
| C(5)   | 866(7)    | 2678(5)  | 8921(6)   | 42.2(15) |
| C(6)   | 1421(6)   | 1676(5)  | 9377(5)   | 45.4(15) |
| C(7)   | -554(7)   | 2493(5)  | 7860(5)   | 40.7(14) |
| C(8)   | -1126(7)  | 3500(5)  | 7397(6)   | 42.9(15) |
| C(9)   | -2470(7)  | 3313(6)  | 6373(6)   | 48.2(16) |
| C(10)  | -3292(7)  | 2095(6)  | 5810(6)   | 47.8(16) |



|        |          |          |           |          |
|--------|----------|----------|-----------|----------|
| C(11)  | -2731(8) | 1086(6)  | 6254(7)   | 59.7(18) |
| C(12)  | -1399(8) | 1261(6)  | 7259(7)   | 55.9(18) |
| C(13)  | 4185(7)  | 5200(5)  | 11233(5)  | 42.1(15) |
| C(14)  | 5581(8)  | 5210(6)  | 12191(6)  | 51.5(16) |
| C(15)  | 6584(8)  | 6313(7)  | 12869(6)  | 56.7(18) |
| C(16)  | 6210(8)  | 7454(6)  | 12576(6)  | 49.9(16) |
| C(17)  | 4859(7)  | 7485(6)  | 11622(6)  | 48.7(16) |
| C(18)  | 3856(7)  | 6353(5)  | 10946(6)  | 43.8(15) |
| C(19)  | 7025(12) | 9633(9)  | 13085(9)  | 63(3)    |
| C(19A) | 8310(30) | 8900(30) | 14180(30) | 61(9)    |
| C(20)  | -5237(9) | 2807(7)  | 4300(7)   | 75(2)    |

---

**Table S3.** Bond lengths [Å] and angles [°] for mo\_d8v20371\_0m.

---

|         |           |
|---------|-----------|
| S1-O4   | 1.417(5)  |
| S1-O5   | 1.446(6)  |
| S1-O6   | 1.425(6)  |
| S1-C21  | 1.823(10) |
| F1-C21  | 1.327(9)  |
| F2-C21  | 1.319(9)  |
| F3-C21  | 1.278(9)  |
| O1-C10  | 1.350(7)  |
| O1-C20  | 1.423(8)  |
| O2-C1   | 1.352(7)  |
| O2-C3   | 1.364(6)  |
| C1-C2   | 1.453(8)  |
| C1-C6   | 1.333(7)  |
| C1-O7   | 1.333(7)  |
| C1-C1A  | 1.352(7)  |
| C3-C4   | 1.367(8)  |
| C3-C13  | 1.450(8)  |
| C3-C1A  | 1.364(6)  |
| C4-C5   | 1.414(8)  |
| C5-C6   | 1.374(7)  |
| C5-C7   | 1.445(8)  |
| C5-O7   | 1.374(7)  |
| C7-C8   | 1.387(8)  |
| C7-C12  | 1.413(8)  |
| C8-C9   | 1.383(8)  |
| C9-C10  | 1.387(8)  |
| C10-C11 | 1.376(8)  |
| C11-C12 | 1.363(9)  |
| C13-C14 | 1.390(8)  |
| C13-C18 | 1.396(7)  |
| C14-C15 | 1.368(9)  |
| C15-C16 | 1.395(8)  |
| C16-C17 | 1.374(8)  |
| C16-O3  | 1.365(10) |
| C1      | C2        |
| C16-O3A | 1.42(3)   |

|            |           |
|------------|-----------|
| C17-C18    | 1.391(8)  |
| O3-C19     | 1.404(13) |
| O3A-C19A   | 1.44(3)   |
| C21A-S1A   | 1.83(3)   |
| C21A-F1A   | 1.32(3)   |
| C21A-F2A   | 1.28(3)   |
| C21A-F3A   | 1.25(3)   |
| S1A-O4A    | 1.35(2)   |
| S1A-O5A    | 1.46(3)   |
| S1A-O6A    | 1.41(3)   |
| O5-S1-O4   | 115.8(4)  |
| O6-S1-O4   | 116.8(4)  |
| O6-S1-O5   | 113.3(4)  |
| C21-S1-O4  | 103.3(4)  |
| C21-S1-O5  | 101.7(5)  |
| C21-S1-O6  | 103.2(4)  |
| C20-O1-C10 | 118.2(5)  |
| C3-O2-C1   | 122.1(5)  |
| C2-C1-O2   | 115.9(6)  |
| C6-C1-O2   | 118.6(5)  |
| C6-C1-C2   | 125.5(6)  |
| O7-C1-O2   | 118.6(5)  |
| O7-C1-C2   | 125.5(6)  |
| O7-C1-C6   | 0.0       |
| C1A-C1-O2  | 0.0       |
| C1A-C1-C2  | 115.9(6)  |
| C1A-C1-C6  | 118.6(5)  |
| C1A-C1O7   | 118.6(5)  |
| C4-C3-O2   | 118.7(5)  |
| C13-C3-O2  | 115.1(5)  |
| C13-C3-C4  | 126.2(5)  |
| C1A-C3-O2  | 0.0       |
| C1A-C3-C4  | 118.7(5)  |
| C1A-C3C13  | 115.1(5)  |
| C5-C4-C3   | 120.7(5)  |
| C6-C5-C4   | 116.0(6)  |
| C7-C5-C4   | 122.5(5)  |
| C7-C5-C6   | 121.5(5)  |

|              |           |
|--------------|-----------|
| O7-C5-C4     | 116.0(6)  |
| O7-C5-C6     | 0.0       |
| O7-C5-C7     | 121.5(5)  |
| C5-C6-C1     | 123.8(5)  |
| C8-C7-C5     | 121.8(5)  |
| C12-C7-C5    | 120.3(5)  |
| C12-C7-C8    | 117.9(6)  |
| C9-C8-C7     | 121.5(6)  |
| C10-C9-C8    | 119.4(6)  |
| C9-C10-O1    | 124.4(6)  |
| C11-C10O1    | 115.8(6)  |
| C11-C10-C9   | 119.8(6)  |
| C12-C11-C10  | 121.2(6)  |
| C11-C12-C7   | 120.2(6)  |
| C14-C13-C3   | 120.9(5)  |
| C18-C13-C3   | 120.9(6)  |
| C18-C13-C14  | 118.1(6)  |
| C15-C14-C13  | 121.7(6)  |
| C16-C15-C14  | 119.0(6)  |
| C17-C16-C15  | 121.2(6)  |
| O3-C16-C15   | 111.3(7)  |
| O3-C16-C17   | 127.5(7)  |
| O3A-C16-C15  | 133.1(14) |
| O3A-C16-C17  | 105.7(13) |
| O3A-C16-O3   | 21.8(12)  |
| C18-C17-C16  | 118.9(6)  |
| C17-C18-C13  | 121.1(6)  |
| F1-C21-S1    | 110.0(6)  |
| F2-C21-S1    | 110.7(6)  |
| F2-C21-F1    | 106.4(8)  |
| F3-C21-S1    | 113.3(7)  |
| F3-C21-F1    | 106.6(8)  |
| F3-C21-F2    | 109.5(8)  |
| C19-O3-C16   | 113.9(8)  |
| C5-O7-C1     | 123.8(5)  |
| C3-C1A-C1    | 122.1(5)  |
| C19A-O3A-C16 | 114(2)    |
| F1A-C21A-S1A | 107(3)    |

|              |        |
|--------------|--------|
| F2A-C21A-S1A | 113(3) |
| F2A-C21A-F1A | 109(3) |
| F3A-C21A-S1A | 109(3) |
| F3A-C21A-F1A | 109(4) |
| F3A-C21A-F2A | 109(3) |
| O4A-S1A-C21A | 104(2) |
| O5A-S1A-C21A | 102(2) |
| O5A-S1A-O4A  | 119(3) |
| O6A-S1A-C21A | 99(2)  |
| O6A-S1A-O4A  | 116(3) |
| O6A-S1A-O5A  | 112(3) |

---
